# Supplementary material for: Excessive rainfall leads to maize yield loss of a comparable magnitude to extreme drought in the United States
Source: PubMed Central journal article supplement (PMC6850578; doi:10.1111/gcb.14628), 2019-04-29
Supplement: GCB-25-2325-s001.pdf [file GCB-25-2325-s001.pdf]

1 Table S1. The number of county-year samples of insurance loss caused by excessive rainfall and other  
 2 co-occurred causes from Wind, Hail, and Flood from 1989 to 2016 for maize. Of the 26,563 county-  
 3 year samples for excessive rainfall loss, 23.6%, 28.5% and 27.4% are associated with loss caused by  
 4 Excess wind, Hail, and Flood, respectively. Note that the county-year samples for causes of loss by  
 5 Wind, Hail, and Flood have overlaps due to the co-occurrence.

|                                              |                  |                 |
|----------------------------------------------|------------------|-----------------|
| Excess<br>Moisture/Precip/Rain<br>(n=26,563) | Wind/Excess Wind | 23.6% (n=6,262) |
|                                              | Hail             | 28.5% (n=7,559) |
|                                              | Flood            | 27.4% (n=7281)  |

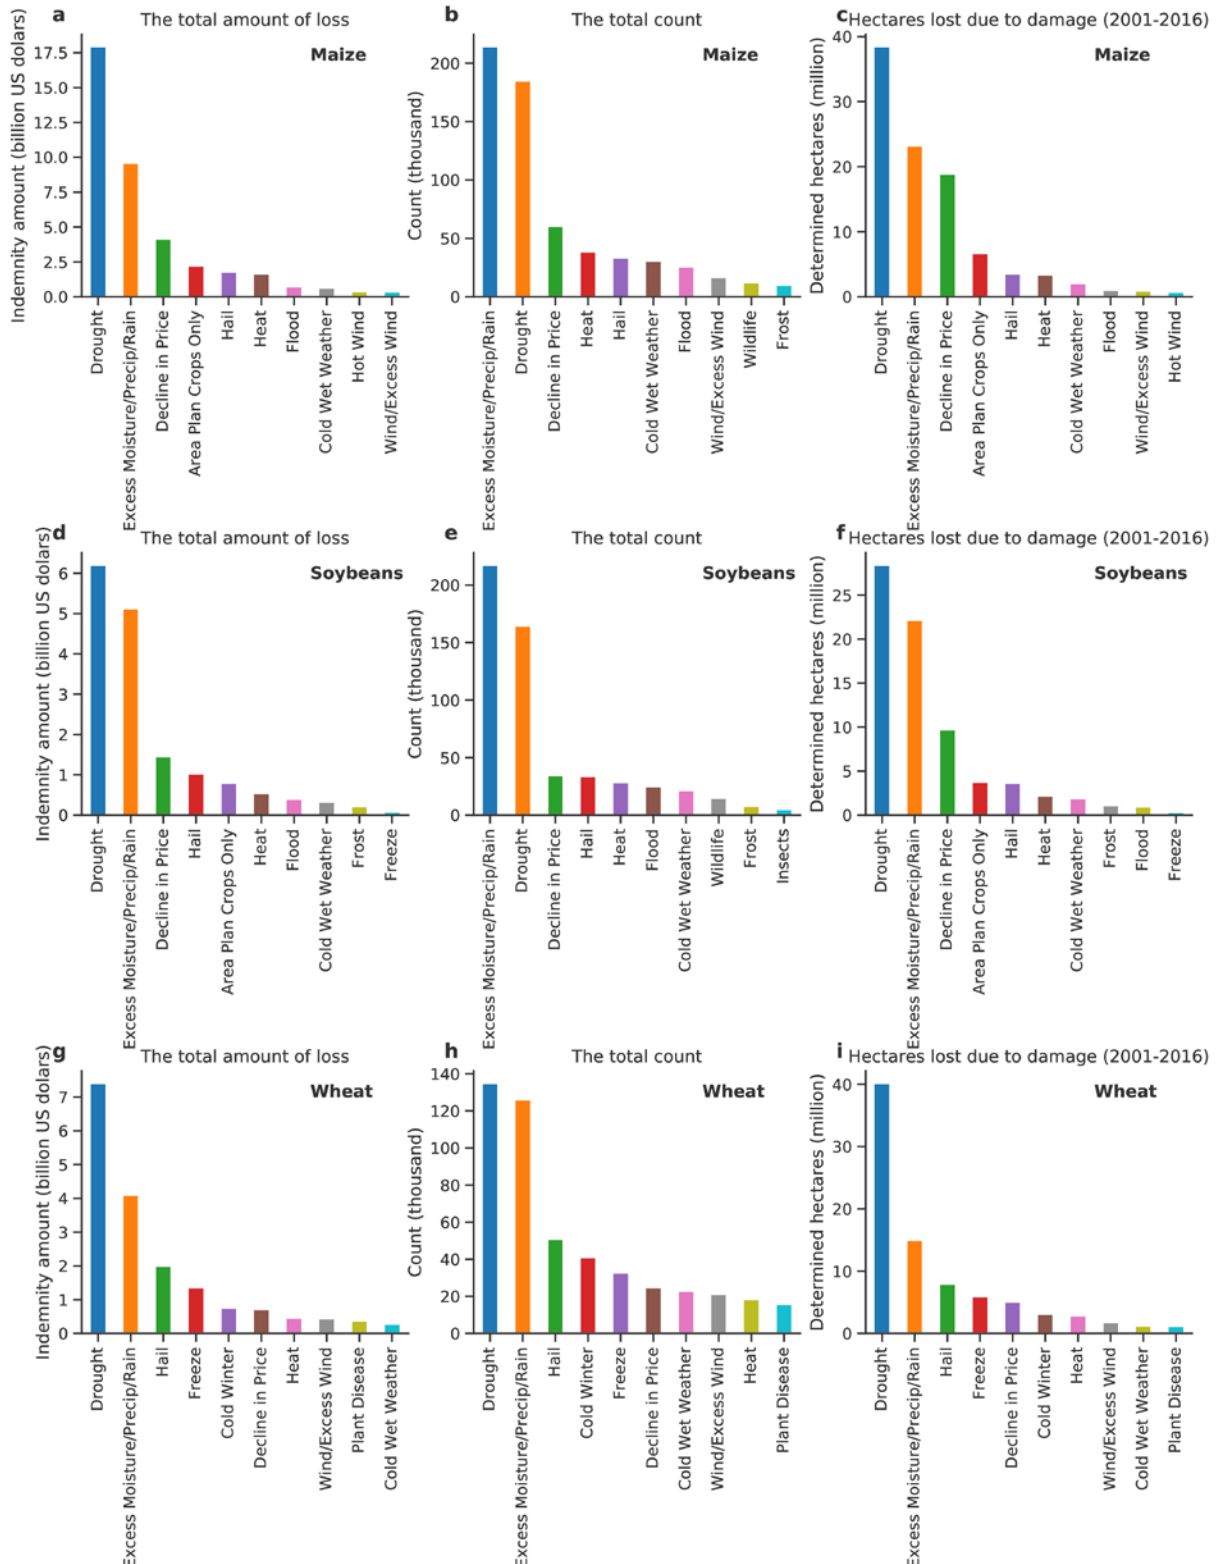

6

7 Fig. S1. The top ten causes of crop loss for maize, soybeans, and wheat in the US from the RMA  
 8 insurance data. (a,d,g) The total amount of loss (sum of indemnity amount) from 1989 to 2016. (b,e,h)  
 9 The total count of loss causes from 1989 to 2016. (c,f,i) The total hectares (sum) lost due to damage  
 10 from 2001 to 2016.

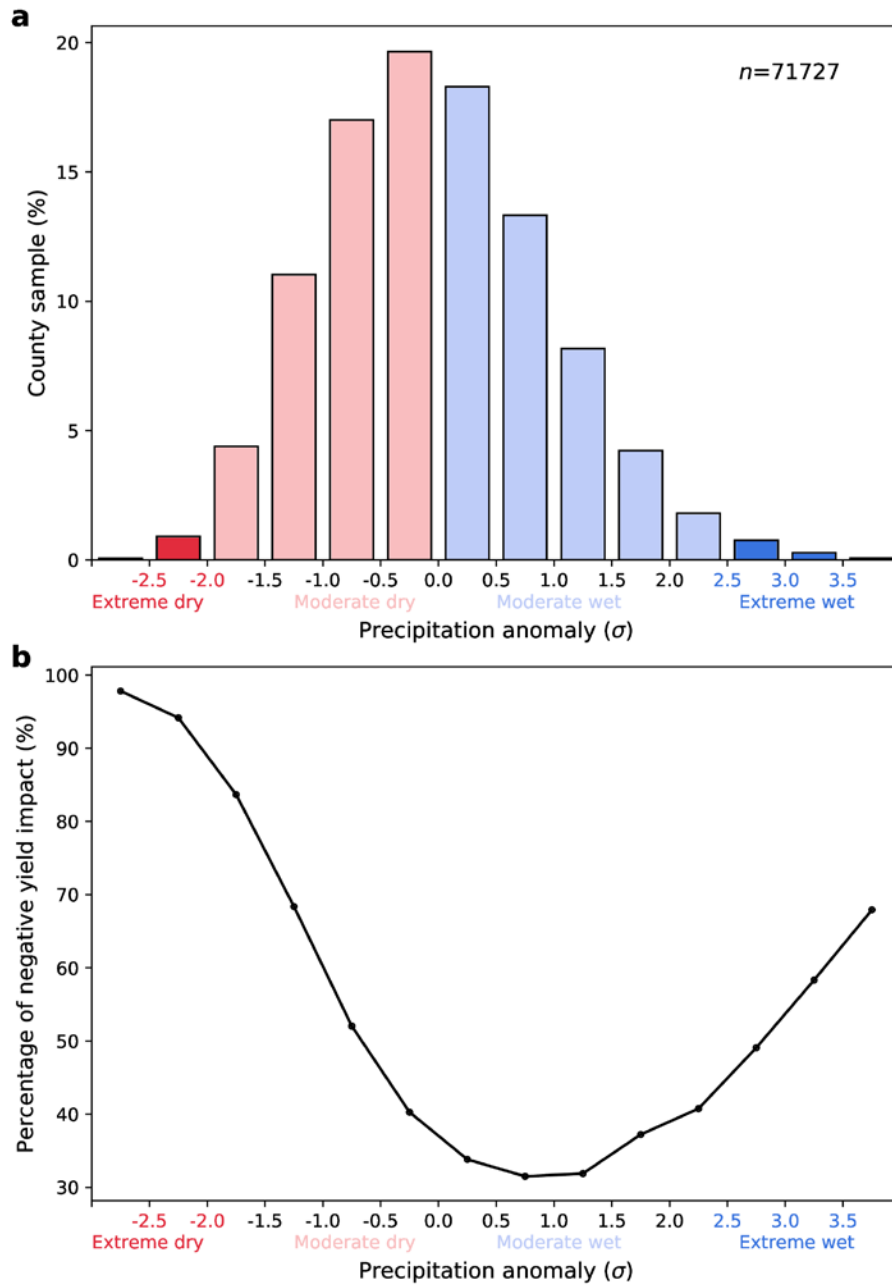

11

12 Fig. S2. (a) The number of county-year samples contained in each precipitation anomaly bin (%). The

13 total number of county sample is 71,727. (b) The percentage of county samples exhibiting negative

14 yield anomaly in each precipitation anomaly bin.

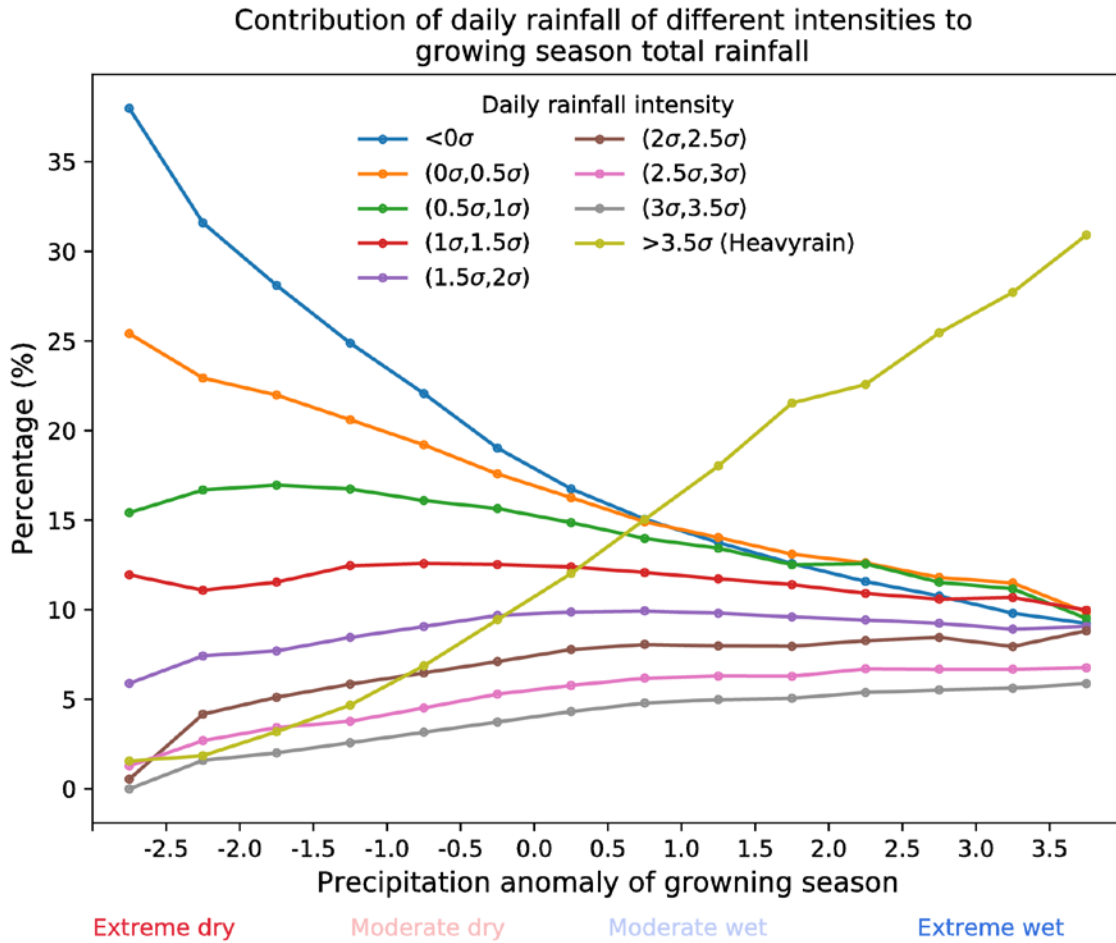

15 Fig S3. The contributions of different rainfall intensities to the growing season total precipitation from  
 16 extreme dry to extreme wet conditions, averaged from 1981 to 2016. The rainfall intensity is defined  
 17 based on the standard anomaly of daily rainfall (i.e.,  $<0\sigma$ ,  $0-0.5\sigma$ ,  $0.5-1\sigma$ ,  $1-1.5\sigma$ ,  $1.5-2\sigma$ ,  $2-2.5\sigma$ ,  $2.5-$   
 18  $3\sigma$ ,  $3-3.5\sigma$ , and  $>3.5\sigma$ , see method) and the “ $>3.5\sigma$ ” category represents the most intensive heavy rain.

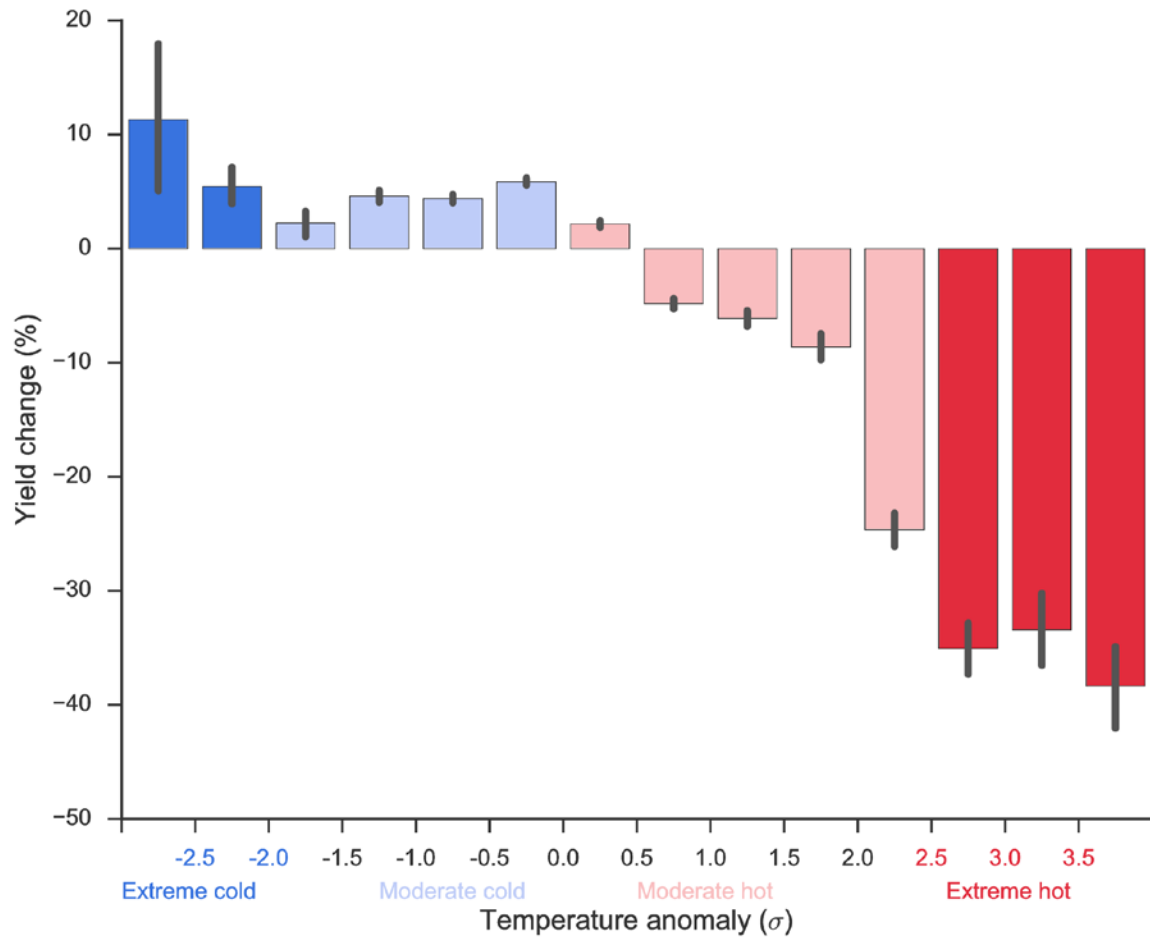

19 Fig. S4. The observed maize yield response to maximum temperature anomaly from 1981 to 2016.

20 Error bars denote the 95% confidence interval estimated from 1,000 times of bootstrap.

21

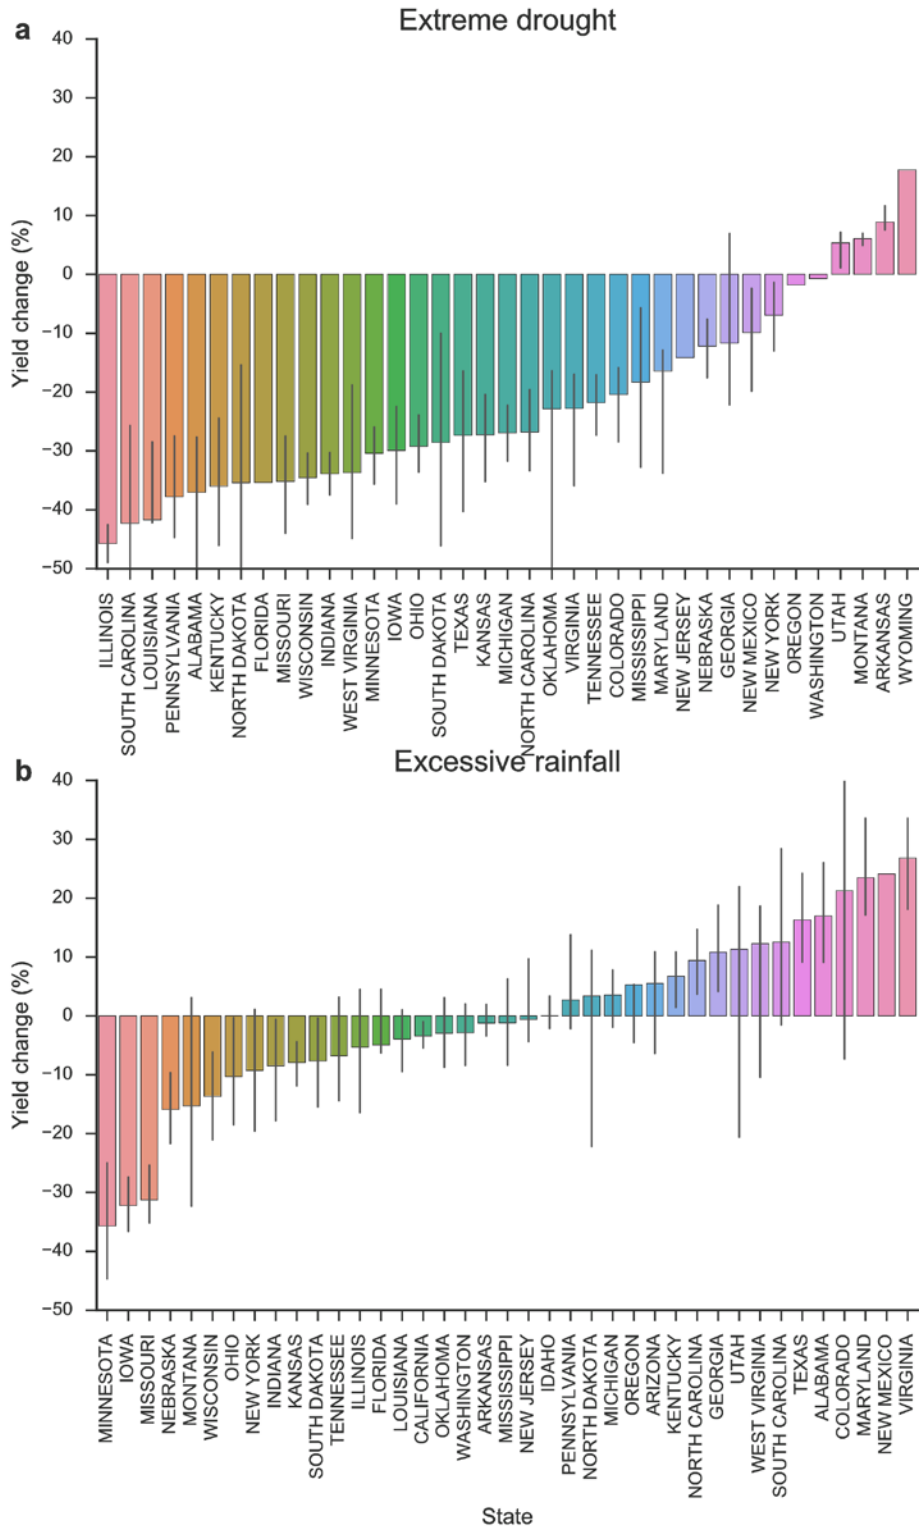

22 Fig. S5. The impacts of extreme drought (a) and excessive rainfall (b) on maize yield from 1981 to  
 23 2016 for individual states. Error bars are estimated from 1,000 boot strapping at 95% significance  
 24 level.

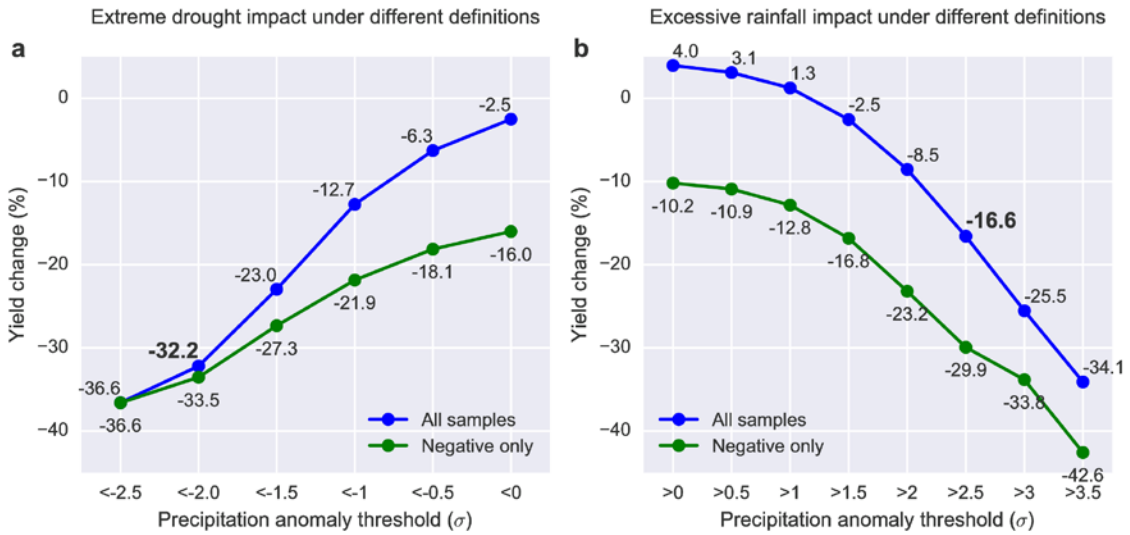

26

27 Fig. S6. The extreme drought (a) and excessive rainfall (b) impacts on maize yield vary with their  
 28 definitions. Extreme drought and excessive rainfall are defined as standard precipitation anomaly  
 29 below or above certain thresholds. Each dot shows the impacts of excessive rainfall (or extreme  
 30 drought) on yield (y-axis) defined by the corresponding threshold of precipitation anomaly on the x-  
 31 axis. The more “strict” definition gives larger impact. The bold font number denotes the definition we  
 32 adopted to report the results in the main text. The yield impact can be calculated from including all  
 33 county samples (blue line) or only including county samples that exhibit negative yield anomaly (green  
 34 line). The latter shows larger impact on maize yield.

35

36

37

38

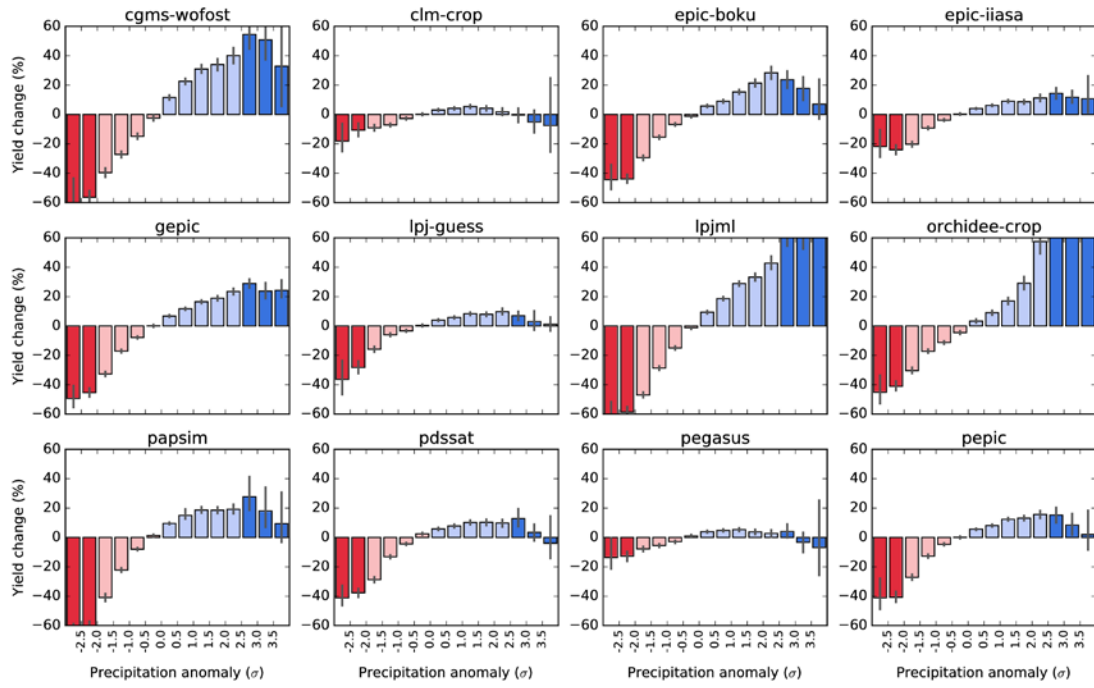

39 Fig. S7. The simulated maize yield response to precipitation anomaly for 12 individual AgMIP global  
 40 crop models.

41



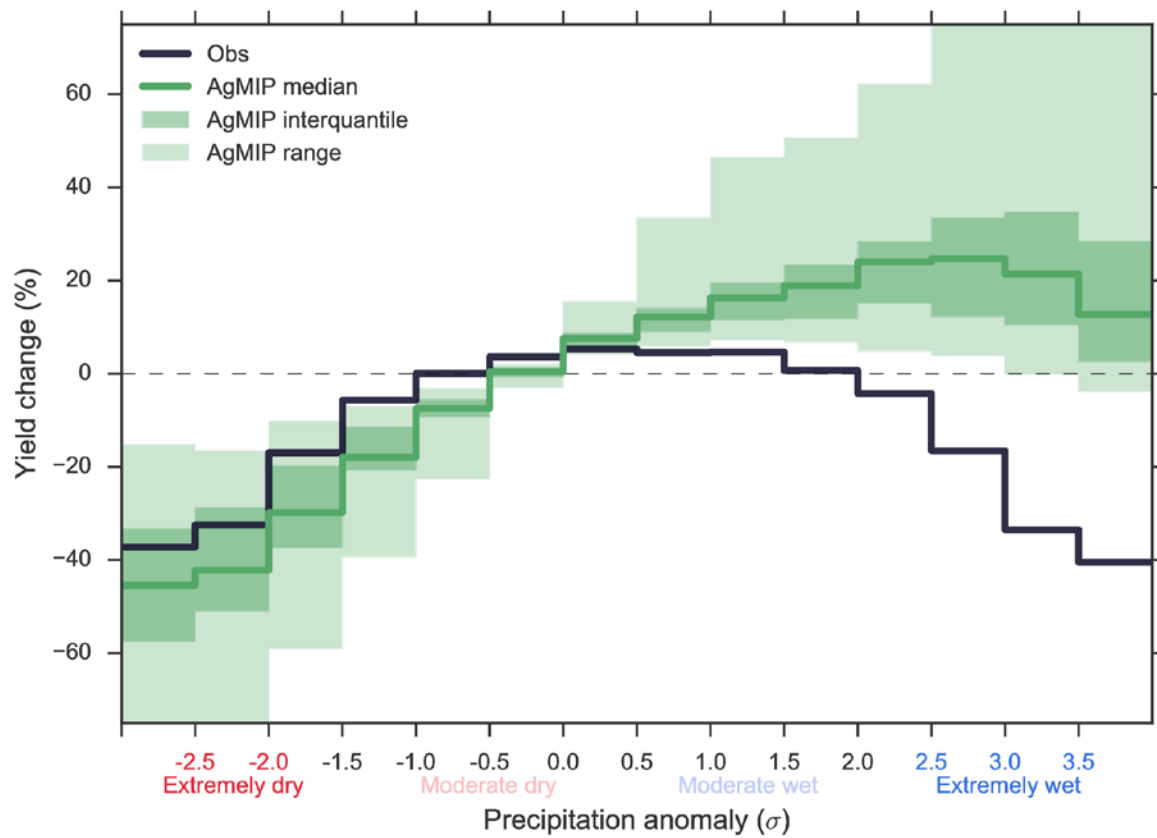

42 Fig S8. Maize yield response to precipitation anomaly from simulations of 12 global crop models  
 43 participated in the AgMIP (green solid line and shaded area) compared with observed response (black  
 44 solid line). Same as Fig 4 but the simulation is driven by WFDEI.GPCC.

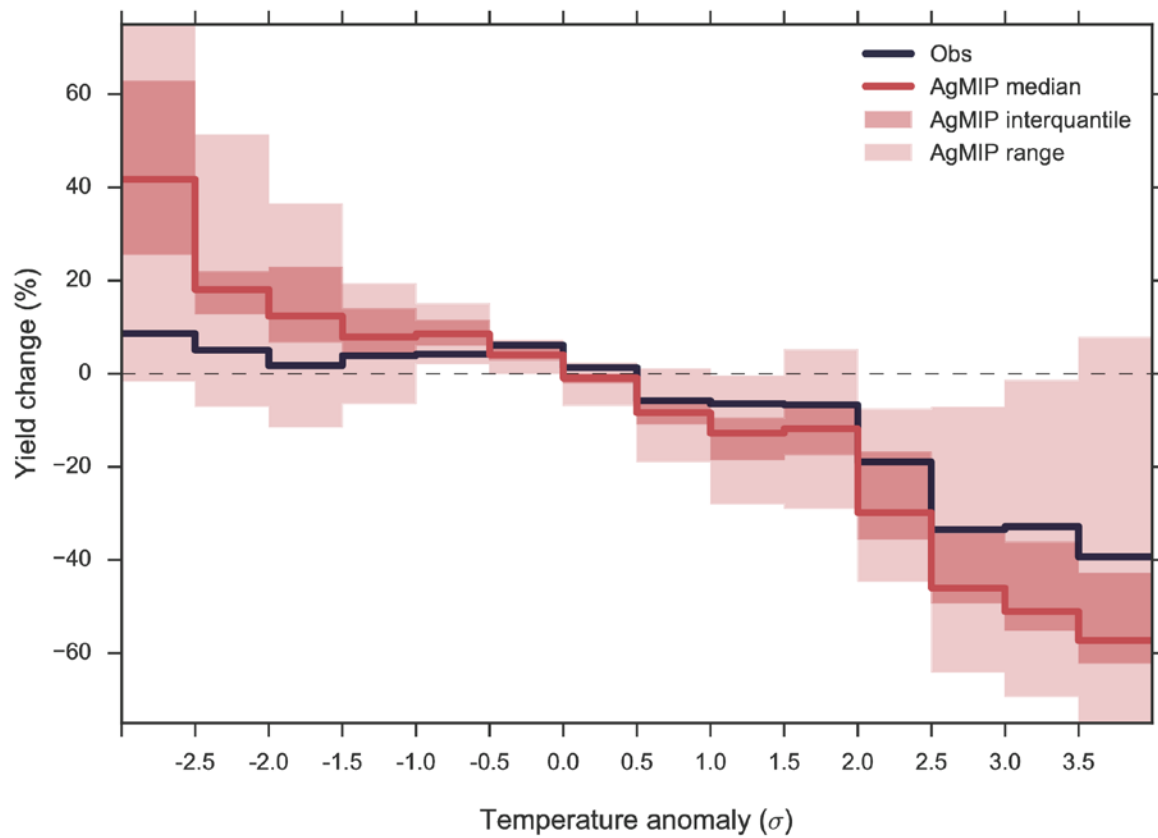

45 Fig. S9. Simulated maize yield response to temperature anomaly from 12 AgMIP global crop models

46 compared with observed response. The simulation is driven by the AgMERRA forcing.

47

48

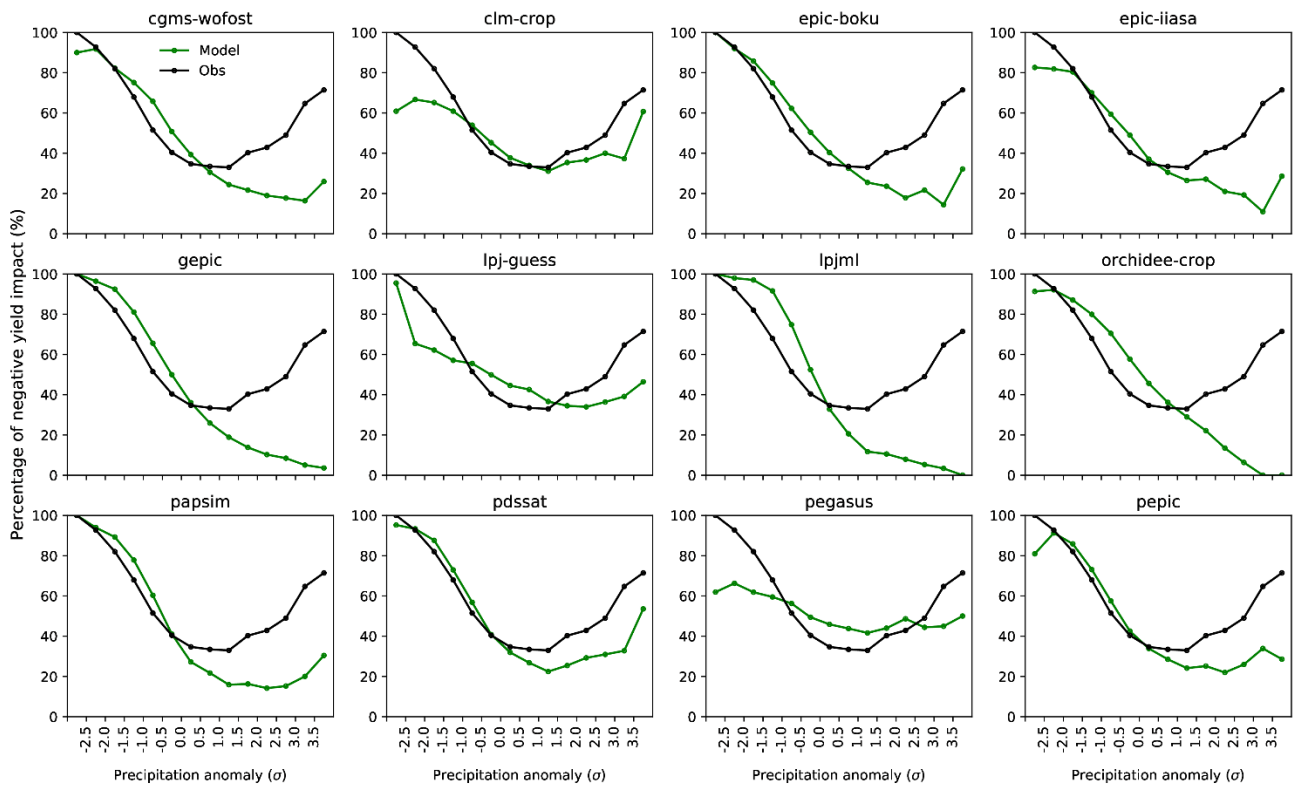

49

50 Fig. S10. The percentage of simulated yield (grid-year samples) exhibiting negative yield anomaly in  
 51 each precipitation anomaly bin from 12 AgMIP global crop models driven by the AgMERRA forcing.  
 52 Similar results with the alternative forcing WFDEI.GPCC are not shown.

53

54

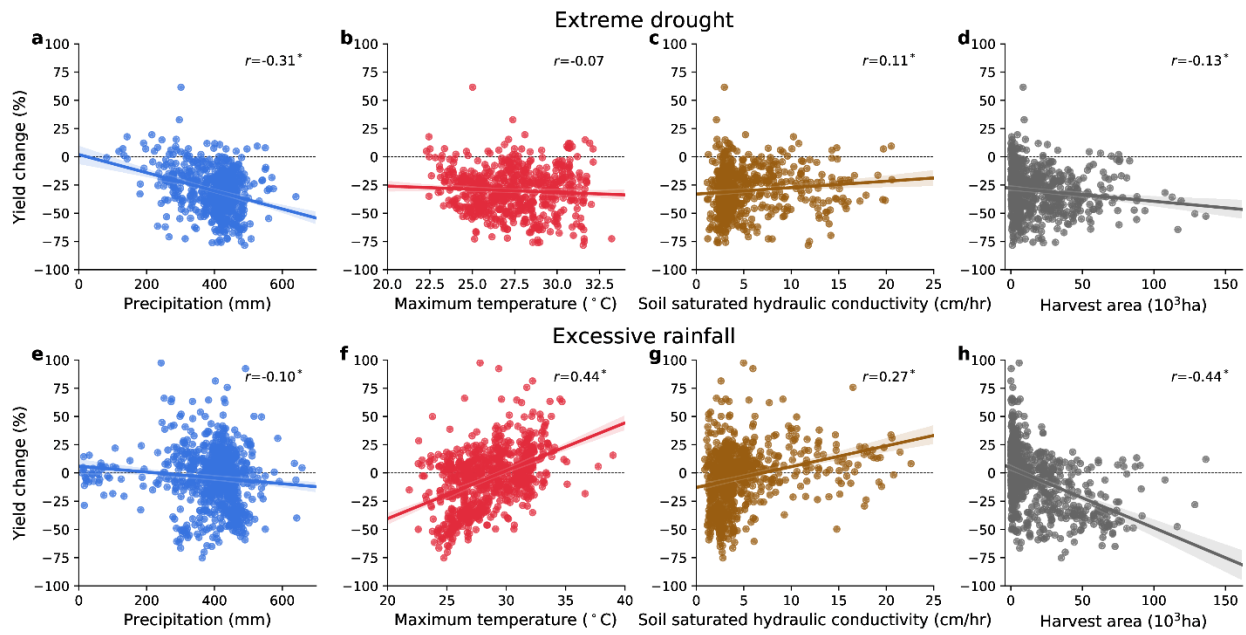

55

56 Fig. S11. Same as Fig 4 but at the county level. The relationship of the large-scale climatic, edaphic,  
 57 and agricultural factors with the (a-d) extreme drought and (e-h) excessive rainfall impacts on maize  
 58 yield across counties.

59

60

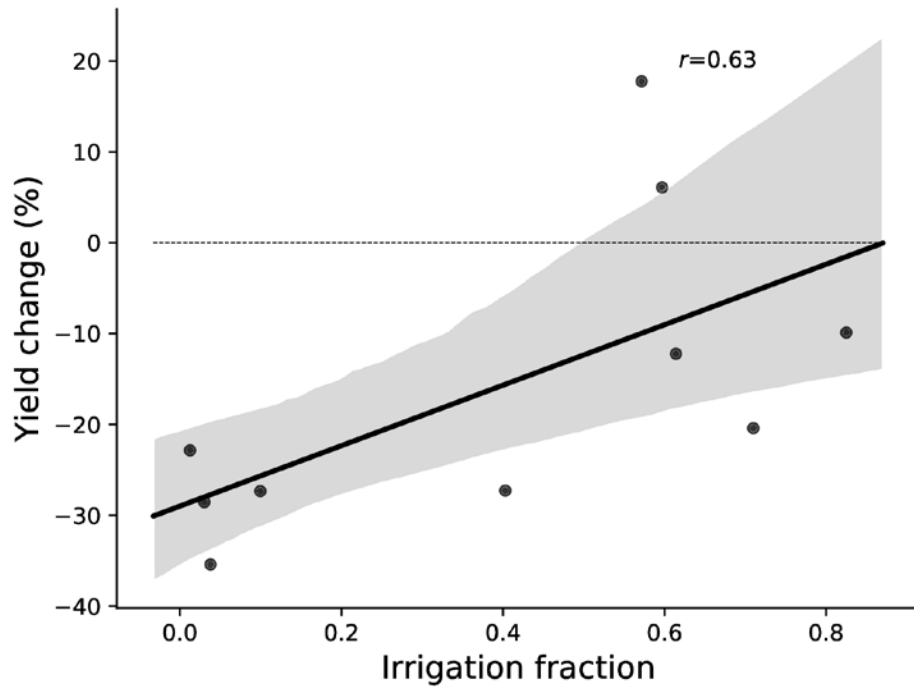

61

62 Fig. S12. The relationship between irrigation fraction and the extreme drought impact of each state.

63 The 11 states with irrigated maize and their areal fractions are: Colorado (71%), Delaware (5%),

64 Kansas (40%), Montana (60%), Nebraska (61%), New Mexico (83%), North Dakota (4%), Oklahoma

65 (1%), South Dakota (3%), Texas (10%), Wyoming (57%).

66

67

68

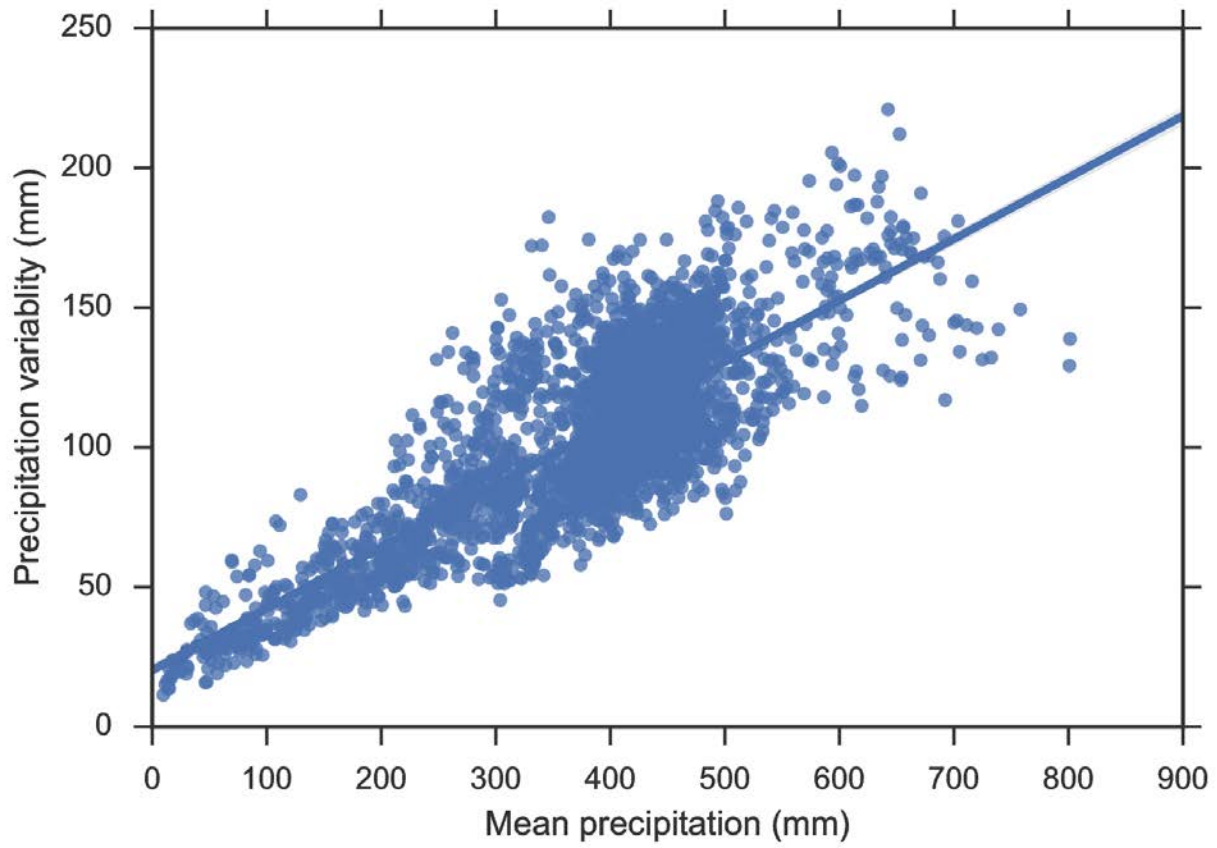

69 Fig. S13. Relationship between growing season mean precipitation and its interannual variability

70 (standard deviation) using county data from 1981 to 2016. The solid line is the fitted line.

71

72

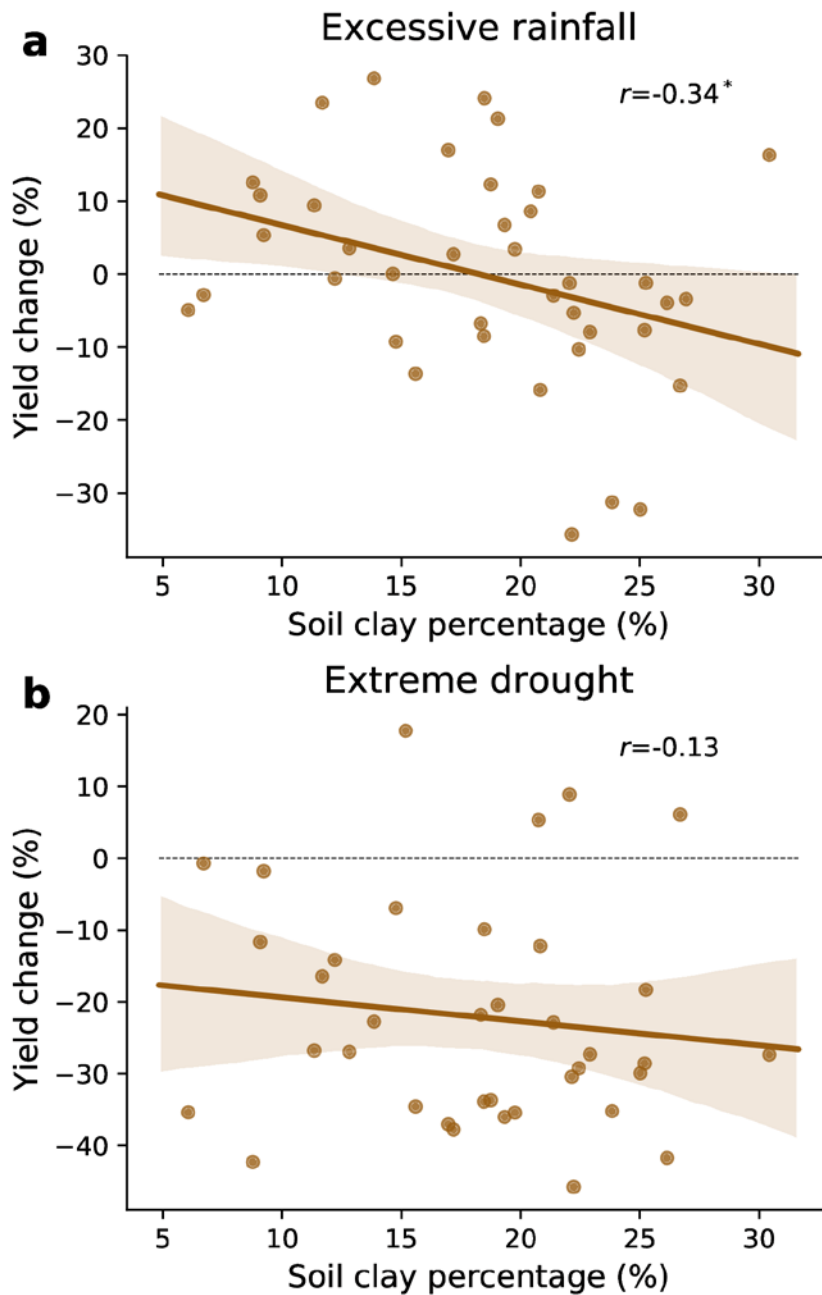

73 Fig. S14. The relationship between soil clay percentage and the impacts of (a) excessive rainfall and (b)  
 74 extreme drought. Each dot represents the impact in one state. Soil clay percentage is the weighted value  
 75 by soil depth to 30 cm. The solid line is the best-fit line and shaded area is the 95% bootstrap  
 76 confidence interval (n=1,000). R is the correlation coefficient, with an asterisk denoting significance at  
 77 95%.

78  
 79  
 80

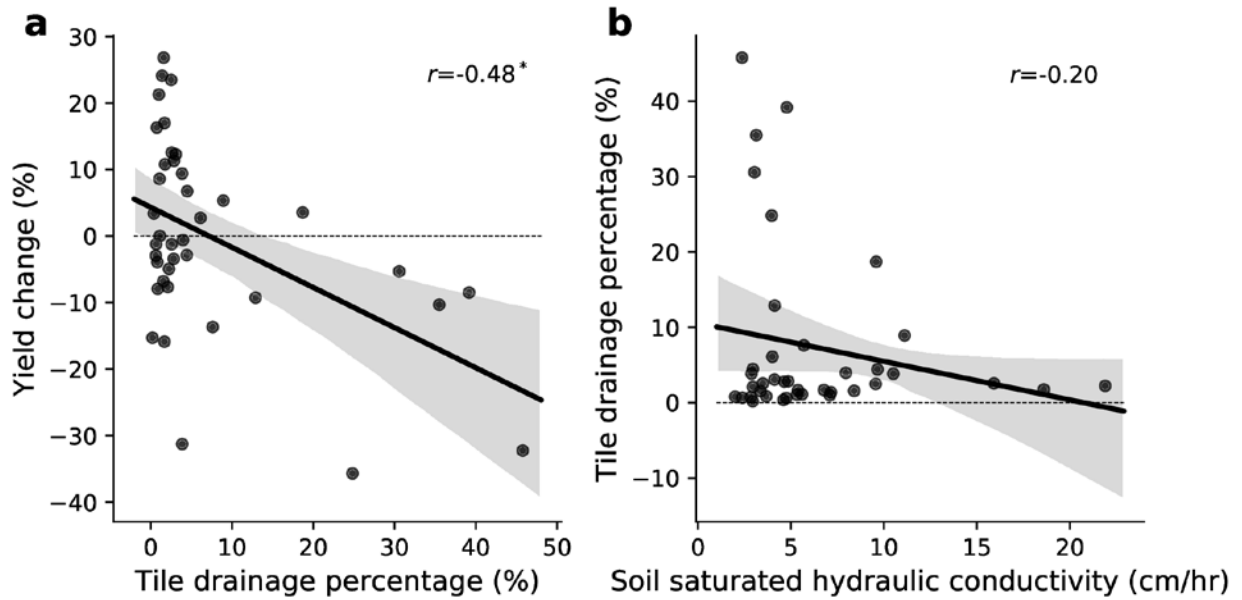

81  
 82 Fig. S15. (a) Relationship between tile drainage percentage and maize yield impact of excessive rainfall  
 83 across states. (b) Relationship between soil saturated hydraulic conductivity and tile drainage across  
 84 states. Each dot represents the impact of excessive rainfall in one state and their corresponding tile  
 85 drainage percentage. The solid line is the best-fit line and shaded area is the 95% bootstrap confidence  
 86 interval (n=1,000). R is the correlation coefficient, with an asterisk denoting significance at 95%.

87  
 88  
 89  
 90  
 91



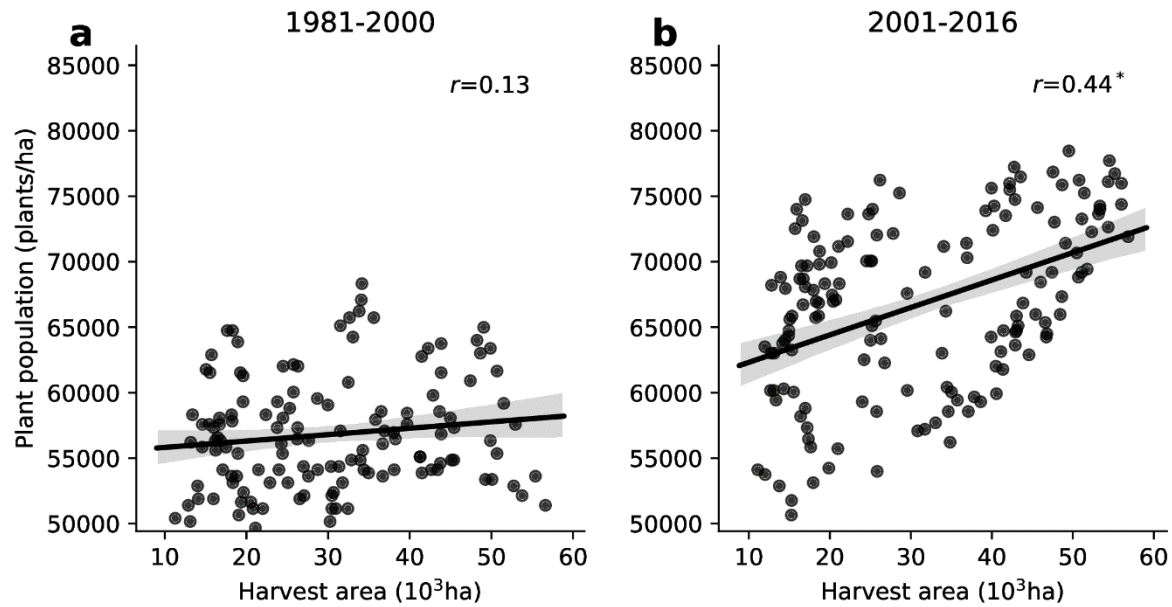

92

93 Fig. S16. Relationship between maize plant population and harvest area in selected states (a) from 1981  
 94 to 2000, and (b) from 2001 to 2016. The solid line is the best-fit line and shaded area is the 95%  
 95 bootstrap confidence interval ( $n=1,000$ ). R is the correlation coefficient, with an asterisk denoting  
 96 significance at 95%. The state level maize population data are available for selected states including  
 97 Illinois, Indiana, Kansas, Minnesota, Missouri, Nebraska, Ohio, South Dakota, and Wisconsin.

98

99

100

101

102

103

104

105

106

107

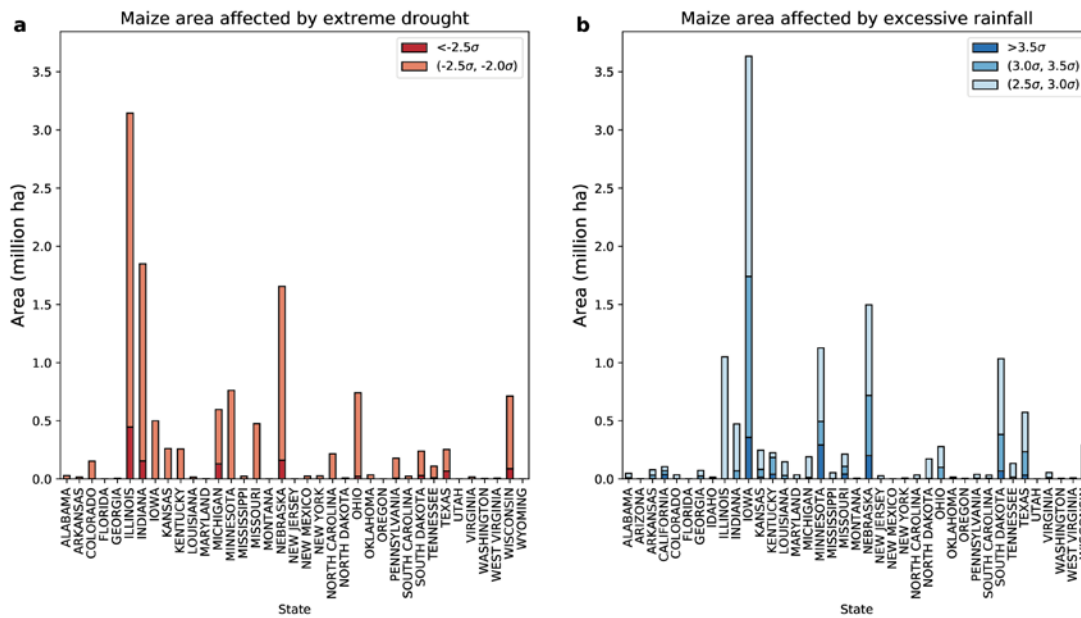

109

110 Fig. S17. Maize harvest area affected by (a) extreme drought and (b) excessive rainfall in different  
 111 states from 1981 to 2016.

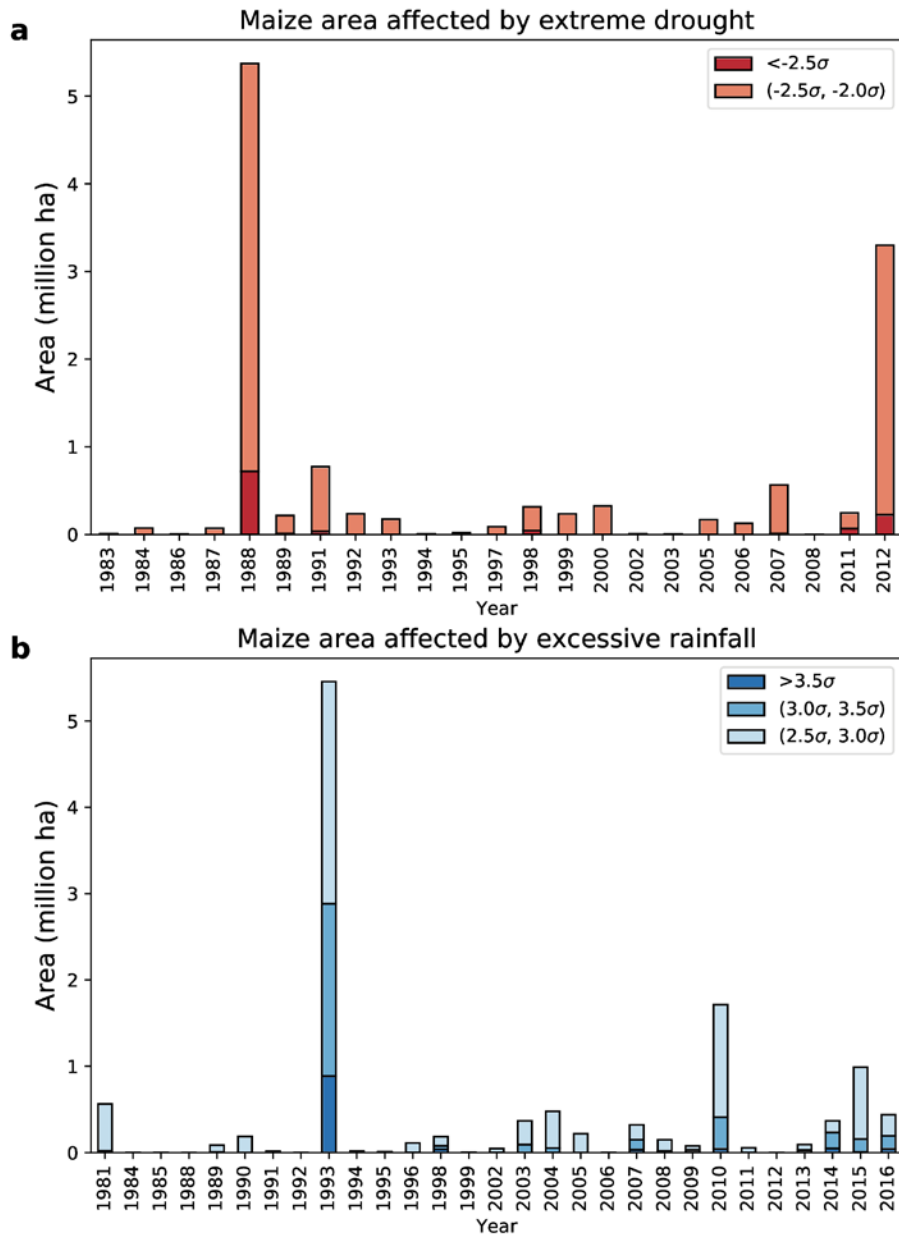

112

113 Fig. S18. Maize harvest area affected by (a) extreme drought and (b) excessive rainfall in each year

114 during the study period.

115

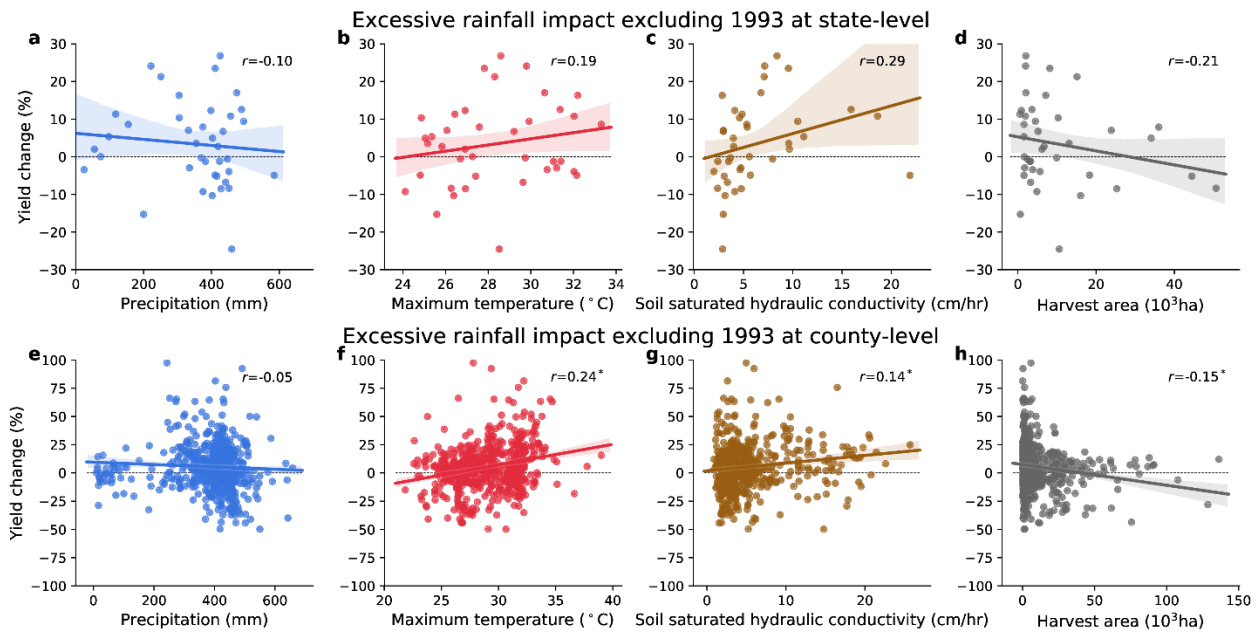

116

117 Fig. S19. Same as Figs 4 and S11 but for excessive rainfall impacts and the extreme year 1993 is

118 excluded. The relationship of the large-scale climatic, edaphic, and agricultural factors and the

119 excessive rainfall impacts on maize yield at **(a-d)** the state level and **(e-h)** the county level.

120

121

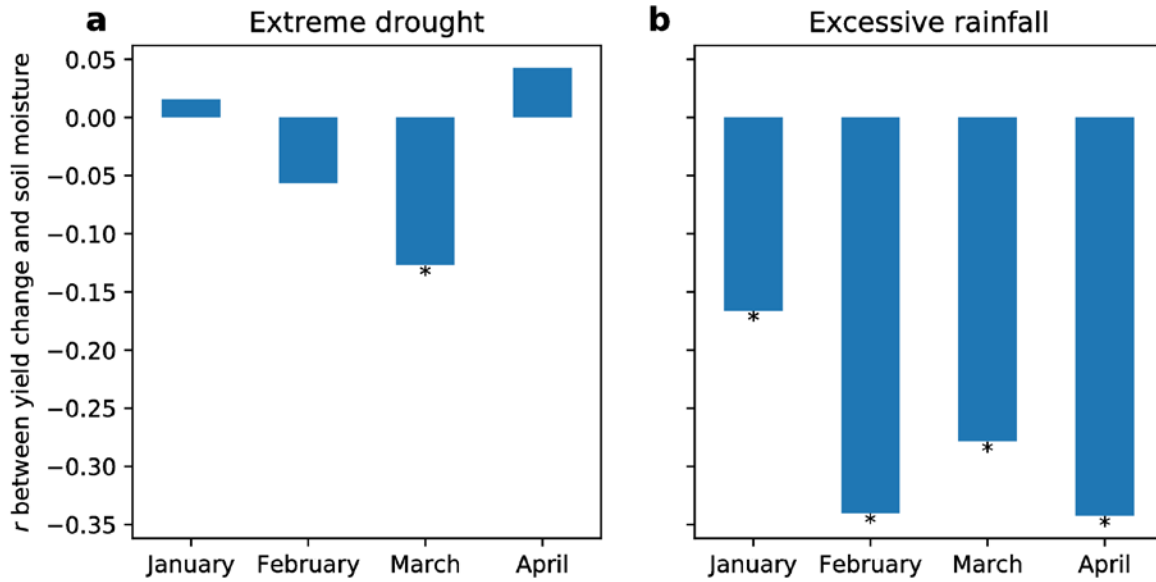

122 Fig. S20. Relationship between the pre-growing season soil moisture and the maize yield impacts of  
 123 extreme drought (a) and excessive rainfall (b). The correlation coefficient is calculated from the yield  
 124 change and their pre-growing season soil moisture from January to April, using the county-year  
 125 samples classified as extreme drought/excessive rainfall from 1981 to 2016. The asterisk on each bar  
 126 indicates that the correlation coefficient is statistically significant at 95%. Note that for correlation with  
 127 the extreme drought impact, county samples from states with irrigation (Colorado, Delaware, Kansas,  
 128 Montana, Nebraska, Texas, South Dakota, New Mexico, North Dakota, Oklahoma, Wyoming) were  
 129 excluded. For correlation with excessive rainfall impact, only county samples from states that exhibited  
 130 yield loss under excessive rainfall conditions (averaged from 1981 and 2016) were used.

131

132

133

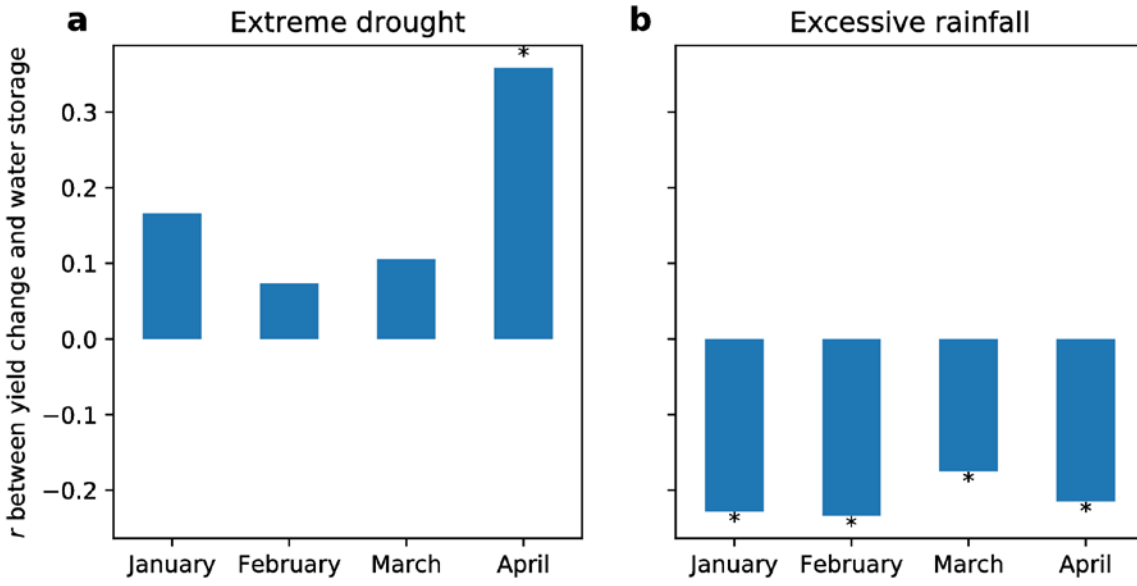

134 Fig. S21. Relationship between the pre-growing season water storage and the maize yield impacts of  
 135 extreme drought (a) and excessive rainfall (b). The correlation coefficient is calculated from the yield  
 136 change and their pre-growing season water storage anomaly fields from January to April, using the  
 137 county-year samples classified as extreme drought/excessive rainfall from 2002 to 2016. The asterisk  
 138 on each bar indicates that the correlation coefficient is statistically significant at 95%. Note that for  
 139 correlation with the extreme drought impact, county samples from states with irrigation (Colorado,  
 140 Delaware, Kansas, Montana, Nebraska, Texas, South Dakota, New Mexico, North Dakota, Oklahoma,  
 141 Wyoming) were excluded. For correlation with excessive rainfall impact, only county samples from  
 142 states that exhibited yield loss under excessive rainfall conditions (averaged from 2002 and 2016) were  
 143 used.

144

145
